# Supplementary material for: First-principles study of the structures and superconductivity of H–S–La systems under high pressure
Source: Royal Society of Chemistry journal article supplement (doi:10.1039/d3cp03368f), 2023-01-01
Supplement: d3cp03368f1.pdf [file d3cp03368f1.pdf]

## Supporting Information

### First-principles study on the structures and superconductivity of H-S-La system under high pressure

*Yin L. Xu,<sup>a</sup> Yang M. Chen,<sup>\*a</sup> Xiao Z. Yan,<sup>\*a</sup> Yi B. Huang<sup>a</sup>, Xing Z. Zhou<sup>a</sup>, Quan X. Wu<sup>a</sup>,  
Xiao W. Sheng<sup>b, c</sup> and Fang G. Kuang<sup>d</sup>*

- a. School of Science, Jiangxi University of Science and Technology, Ganzhou  
341000, Jiangxi, China.
- b. Address here Department of Physics, Anhui Normal University, Anhui, Wuhu  
241000, China
- c. Anhui Province Key Laboratory of Optoelectric Materials Science and  
Technology, Wuhu 241000, China.
- d. School of Physics and Electronic Information, Gannan Normal University,  
Ganzhou 341000, China

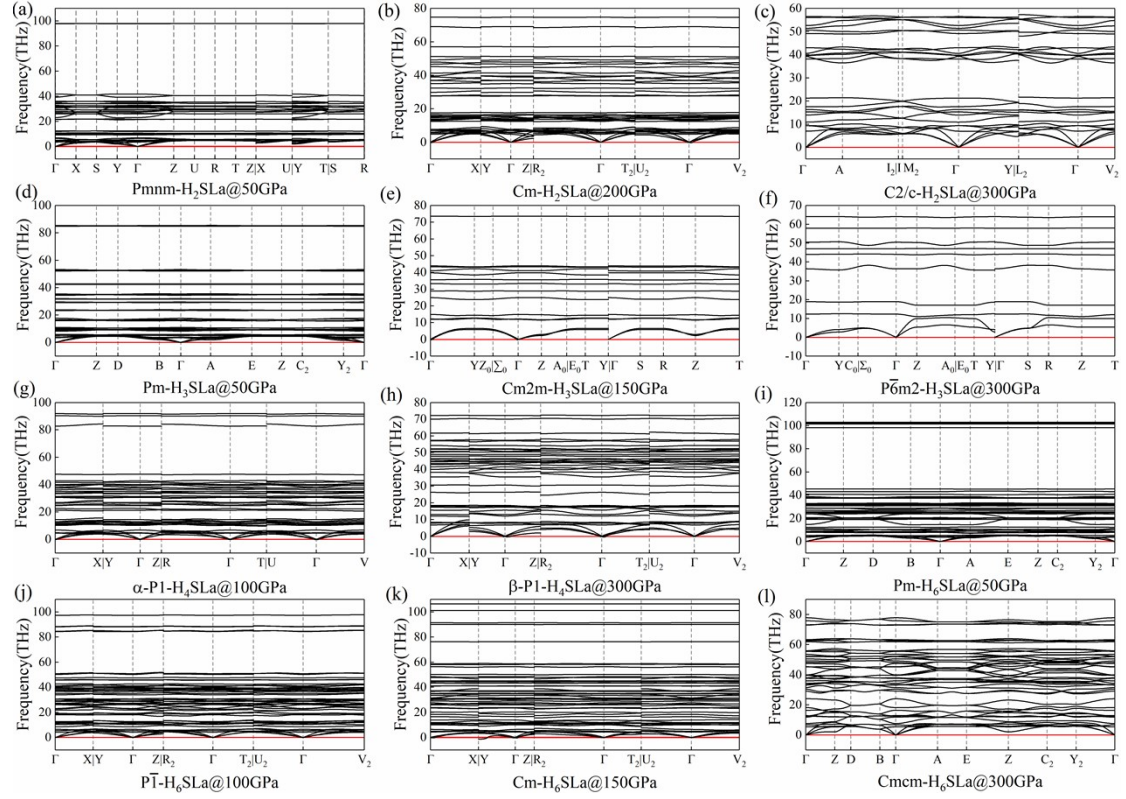

**Fig. S1** Phonon dispersion curves (a)  $Pmm$ -H<sub>2</sub>SLa at 50 GPa (b)  $Cm$ -H<sub>2</sub>SLa at 200 GPa (c)  $C2/c$ -H<sub>2</sub>SLa at 300 GPa (d)  $Pm$ -H<sub>3</sub>SLa at 50 GPa (e)  $Cm2m$ -H<sub>3</sub>SLa at 150 GPa (f)  $P\bar{6}m2$ -H<sub>3</sub>SLa at 300 GPa (g)  $\alpha$ - $P1$ -H<sub>4</sub>SLa at 100 GPa (h)  $\beta$ - $P1$ -H<sub>4</sub>SLa at 300 GPa (i)  $Pm$ -H<sub>6</sub>SLa at 50 GPa (j)  $P\bar{1}$ -H<sub>6</sub>SLa at 100 GPa (k)  $Cm$ -H<sub>6</sub>SLa at 150 GPa and (l)  $Cmcm$ -H<sub>6</sub>SLa at 300 GPa

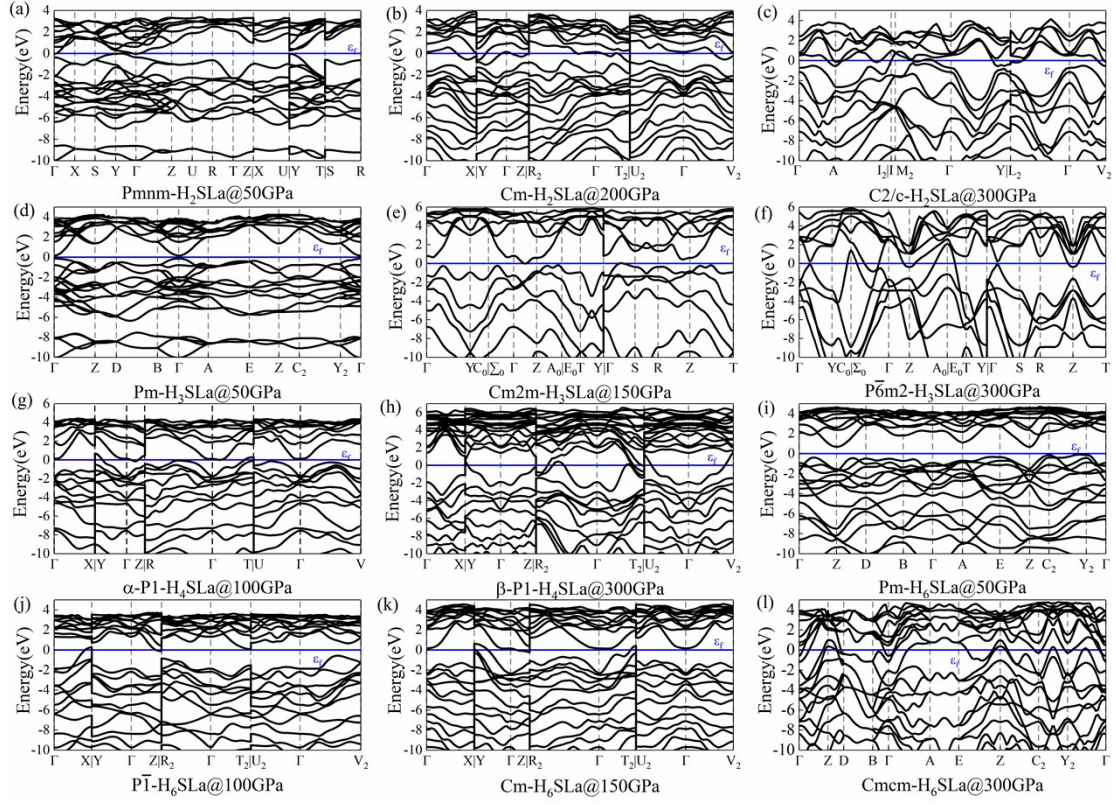

**Fig. S2** Electronic band structures (a)  $Pmm$ - $H_2SLa$  at 50 GPa (b)  $Cm$ - $H_2SLa$  at 200 GPa (c)  $C2/c$ - $H_2SLa$  at 300 GPa (d)  $Pm$ - $H_3SLa$  at 50 GPa (e)  $Cm2m$ - $H_3SLa$  at 150 GPa (f)  $P6m2$ - $H_3SLa$  at 300 GPa (g)  $\alpha$ - $P1$ - $H_4SLa$  at 100 GPa (h)  $\beta$ - $P1$ - $H_4SLa$  at 300 GPa (i)  $Pm$ - $H_6SLa$  at 50 GPa (j)  $P1$ - $H_6SLa$  at 100 GPa (k)  $Cm$ - $H_6SLa$  at 150 GPa and (l)  $Cmc$ - $H_6SLa$  at 300 GPa

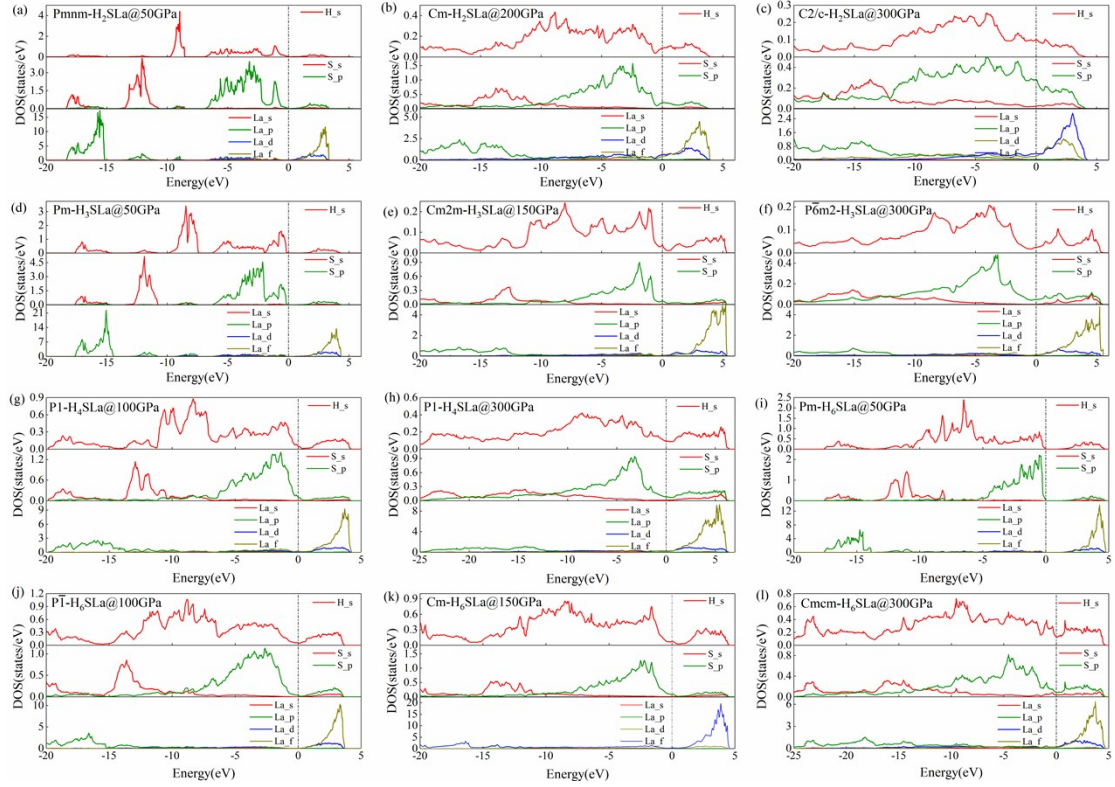

**Fig. S3** Partial density of states (a)  $Pmnm$ - $H_2SLa$  at 50 GPa (b)  $Cm$ - $H_2SLa$  at 200 GPa (c)  $C2/c$ - $H_2SLa$  at 300 GPa (d)  $Pm$ - $H_3SLa$  at 50 GPa (e)  $Cm2m$ - $H_3SLa$  at 150 GPa (f)  $P\bar{6}m2$ - $H_3SLa$  at 300 GPa (g)  $\alpha$ - $P1$ - $H_4SLa$  at 100 GPa (h)  $\beta$ - $P1$ - $H_4SLa$  at 300 GPa (i)  $Pm$ - $H_6SLa$  at 50 GPa (j)  $P\bar{1}$ - $H_6SLa$  at 100 GPa (k)  $Cm$ - $H_6SLa$  at 150 GPa and (l)  $Cmc$ - $H_6SLa$  at 300 GPa

**Table S1** Bader charge analysis of  $Cm$ - $H_2SLa$  at 200 GPa.

| Atom | Charge value/e | Charge transfer $\sigma(e)$ |
|------|----------------|-----------------------------|
| H1   | 1.005702       | -0.005702                   |
| H2   | 1.279160       | -0.279160                   |
| H3   | 1.232920       | -0.232920                   |
| H4   | 1.074050       | -0.074050                   |
| H5   | 1.121001       | -0.121001                   |
| H6   | 0.966219       | 0.033781                    |
| S1   | 6.764084       | -0.764084                   |
| S2   | 6.857769       | -0.857769                   |
| S3   | 6.739494       | -0.739494                   |
| La1  | 9.919119       | 1.080881                    |
| La2  | 10.051050      | 0.94895                     |
| La3  | 9.989432       | 1.010568                    |

**Table S2** Bader charge analysis of  $C2/c$ - $H_2SLa$  at 300 GPa.

| Atom | Charge value/e | Charge transfer $\sigma(e)$ |
|------|----------------|-----------------------------|
| H1   | 1.159932       | -0.159932                   |
| H2   | 1.159932       | -0.159932                   |
| H3   | 1.159815       | -0.159815                   |
| H4   | 1.159815       | -0.159815                   |
| S1   | 6.525008       | -0.525008                   |
| S2   | 6.525008       | -0.525008                   |
| La1  | 10.155245      | 0.844755                    |
| La2  | 10.155245      | 0.844755                    |

**Table S3** Bader charge analysis of *Cmcm*-H<sub>6</sub>SLa at 300 GPa.

| Atom | Charge value/e | Charge transfer $\sigma(e)$ |
|------|----------------|-----------------------------|
| H1   | 1.097159       | -0.097159                   |
| H2   | 1.097159       | -0.097159                   |
| H3   | 0.920404       | 0.079596                    |
| H4   | 0.920404       | 0.079596                    |
| H5   | 1.189627       | -0.189627                   |
| H6   | 1.189388       | -0.189388                   |
| H7   | 1.224568       | -0.224568                   |
| H8   | 1.189388       | -0.189388                   |
| H9   | 0.920404       | 0.079596                    |
| H10  | 1.224568       | -0.224568                   |
| H11  | 0.920404       | 0.079596                    |
| H12  | 1.189627       | -0.189627                   |
| S1   | 6.493544       | -0.493544                   |
| S2   | 6.493544       | -0.493544                   |
| La1  | 9.964905       | 1.035095                    |
| La2  | 9.964905       | 1.035095                    |

**Table S4** Lattice parameters and atomic positions for predicted H-S-La systems

| Compound           | Pressure<br>GPa | Space<br>group | Lattice parameters<br>Å, degree | Atomic positions     |
|--------------------|-----------------|----------------|---------------------------------|----------------------|
| H <sub>2</sub> SLa | 50              | <i>Pmnm</i>    | a=6.454                         | H 0.562 0.425 0.500  |
|                    |                 |                | b=6.593                         | H 0.937 0.574 0.000  |
|                    |                 |                | c=3.718                         | H 0.156 0.066 0.500  |
|                    |                 |                | $\alpha=\beta=\gamma=90$        | H 0.343 0.933 0.000  |
|                    |                 |                |                                 | H 0.656 0.933 0.000  |
|                    |                 |                |                                 | H 0.843 0.066 0.500  |
|                    |                 |                |                                 | H 0.062 0.574 0.000  |
|                    |                 |                |                                 | H 0.437 0.425 0.500  |
|                    |                 |                |                                 | S 0.774 0.713 0.500  |
|                    |                 |                |                                 | S 0.725 0.286 0.000  |
|                    |                 |                |                                 | S 0.225 0.713 0.500  |
|                    |                 |                |                                 | S 0.274 0.286 0.000  |
|                    |                 |                |                                 | La 0.500 0.626 0.000 |
|                    |                 |                |                                 | La 0.000 0.373 0.500 |
|                    |                 |                |                                 | La 0.000 0.936 0.000 |
|                    |                 |                |                                 | La 0.500 0.063 0.500 |
|                    | 200             | <i>Cm</i>      | a=2.851                         | H 0.575 0.150 0.649  |
|                    |                 |                | b=4.816                         | H 0.718 0.436 0.643  |
|                    |                 |                | c=6.125                         | H 0.206 0.412 0.215  |
|                    |                 |                | $\alpha=99.00$                  | H 0.527 0.055 0.766  |
|                    |                 |                | $\beta=89.99$                   | H 0.728 0.456 0.343  |
|                    |                 |                | $\gamma=107.22$                 | H 0.675 0.351 0.452  |
|                    |                 |                |                                 | S 0.066 0.133 0.472  |
|                    |                 |                |                                 | S 0.918 0.836 0.833  |
|                    |                 |                |                                 | S 0.835 0.670 0.162  |
|                    |                 |                |                                 | La 0.349 0.699 0.505 |
|                    |                 |                |                                 | La 0.548 0.096 0.137 |
|                    |                 |                |                                 | La 0.195 0.391 0.864 |

|                    |     |                    |                                                                                      |                                                                                                                                                                                                                                                                                                                                                                                                                                                                              |
|--------------------|-----|--------------------|--------------------------------------------------------------------------------------|------------------------------------------------------------------------------------------------------------------------------------------------------------------------------------------------------------------------------------------------------------------------------------------------------------------------------------------------------------------------------------------------------------------------------------------------------------------------------|
|                    | 300 | $C2/c$             | a=3.687<br>b=c=3.703<br>$\alpha=102.95$<br>$\beta=\gamma=104.28$                     | H 0.851 0.346 0.043<br>H 0.351 0.043 0.346<br>H 0.148 0.653 0.956<br>H 0.648 0.956 0.653<br>S 0.250 0.569 0.430<br>S 0.750 0.430 0.569<br>La 0.250 0.153 0.846<br>La 0.750 0.846 0.153                                                                                                                                                                                                                                                                                       |
| H <sub>3</sub> SLa | 50  | $Pm$               | a=7.053<br>b=3.53<br>c=6.809<br>$\alpha=\beta=\gamma=90$                             | H 0.995 1.000 0.939<br>H 0.495 0.500 0.583<br>H 0.051 0.500 0.083<br>H 0.643 0.000 0.281<br>H 0.903 1.000 0.781<br>H 0.143 0.500 0.362<br>H 0.403 0.500 0.741<br>H 0.551 0.000 0.439<br>H 0.403 0.500 0.862<br>H 0.643 0.000 0.160<br>H 0.903 1.000 0.660<br>H 0.143 0.500 0.241<br>S 0.238 1.000 0.530<br>S 0.808 0.500 0.491<br>S 0.738 0.500 0.991<br>S 0.308 0.000 0.030<br>La 0.085 0.500 0.788<br>La 0.961 0.000 0.233<br>La 0.585 1.000 0.733<br>La 0.461 0.500 0.288 |
|                    | 150 | $Cm2m$             | a=2.853<br>b=2.881<br>c=3.961<br>$\alpha=68.67$<br>$\beta=\gamma=90$                 | H 0.154 0.751 0.497<br>H 0.500 0.888 0.223<br>H 0.845 0.751 0.497<br>S 0.500 0.176 0.647<br>La -0.000 0.464 0.070                                                                                                                                                                                                                                                                                                                                                            |
|                    | 300 | $\bar{p}\bar{b}m2$ | a=b=2.718<br>c=3.756<br>$\alpha=\beta=90$<br>$\gamma=120$                            | H 0.333 0.666 0.194<br>H 0.666 0.333 0.000<br>H 0.333 0.666 0.805<br>S 0.000 0.000 0.000<br>La 0.666 0.333 0.500                                                                                                                                                                                                                                                                                                                                                             |
| H <sub>4</sub> SLa | 100 | $PI$               | a=3.049<br>b=4.098<br>c=6.673<br>$\alpha=107.34$<br>$\beta=90.36$<br>$\gamma=111.47$ | H 0.867 0.608 0.271<br>H 0.819 0.520 0.626<br>H 0.554 0.578 0.536<br>H 0.961 0.795 0.107<br>H 0.308 0.585 0.482<br>H 0.787 0.443 0.944<br>H 0.743 0.360 0.814<br>H 0.931 0.694 0.401<br>S 0.118 0.108 0.651<br>S 0.243 0.356 0.102<br>La 0.462 0.801 0.860<br>La 0.597 0.065 0.336                                                                                                                                                                                           |

|                    |     |            |                                                                                     |                                                                                                                                                                                                                                                                                                                                                                                   |
|--------------------|-----|------------|-------------------------------------------------------------------------------------|-----------------------------------------------------------------------------------------------------------------------------------------------------------------------------------------------------------------------------------------------------------------------------------------------------------------------------------------------------------------------------------|
|                    | 300 | $P1$       | a=3.692<br>b=3.858<br>c=3.894<br>$\alpha=92.30$<br>$\beta=\gamma=104.50$            | H 0.592 0.344 0.527<br>H 0.834 0.232 0.757<br>H 0.854 0.738 0.257<br>H 0.572 0.833 0.015<br>H 0.851 0.073 0.923<br>H 0.015 0.944 0.631<br>H 0.833 0.570 0.412<br>H 0.077 0.466 0.646<br>S 0.996 0.691 0.903<br>S 0.001 0.194 0.350<br>La 0.437 0.805 0.482<br>La 0.432 0.298 0.987                                                                                                |
| H <sub>6</sub> SLa | 50  | $Pm$       | a=6.898<br>b=3.410<br>c=4.560<br>$\alpha=\gamma=90$<br>$\beta=108.18$               | H 0.984 0.000 0.015<br>H 0.319 -0.000 0.947<br>H 0.028 0.500 0.221<br>H 0.599 0.000 0.384<br>H 0.184 0.500 0.906<br>H 0.106 -0.000 0.074<br>H 0.771 0.000 0.142<br>H 0.613 0.000 0.768<br>H 0.906 0.500 0.183<br>H 0.061 0.500 0.868<br>H 0.491 0.000 0.705<br>H 0.477 -0.000 0.320<br>S 0.773 0.500 0.652<br>S 0.317 0.500 0.437<br>La 0.545 0.500 0.044<br>La 0.045 0.000 0.544 |
|                    | 100 | $P\bar{1}$ | a=4.070<br>b=4.154<br>c=5.271<br>$\alpha=111.15$<br>$\beta=92.60$<br>$\gamma=75.99$ | H 0.677 0.756 0.051<br>H 0.564 0.061 0.535<br>H 0.322 0.243 0.948<br>H 0.782 0.872 0.896<br>H 0.784 0.721 0.642<br>H 0.435 0.938 0.464<br>H 0.507 0.813 0.154<br>H 0.217 0.127 0.103<br>H 0.875 0.755 0.516<br>H 0.215 0.278 0.357<br>H 0.124 0.244 0.483<br>H 0.492 0.186 0.845<br>S 0.890 0.274 0.753<br>S 0.109 0.725 0.246<br>La 0.713 0.311 0.238<br>La 0.286 0.688 0.761    |

|     |                      |                   |                      |
|-----|----------------------|-------------------|----------------------|
| 150 | <i>Cm</i>            | a=2.931           | H 0.379 0.759 0.368  |
|     |                      | b=3.918           | H 0.363 0.727 0.476  |
|     |                      | c=6.992           | H 0.555 0.110 0.645  |
|     |                      | $\alpha=102.18$   | H 0.962 0.924 0.188  |
|     |                      | $\beta=90$        | H 0.068 0.136 0.151  |
|     |                      | $\gamma=111.96$   | H 0.450 0.901 0.662  |
|     |                      |                   | H 0.960 0.921 0.360  |
|     |                      |                   | H 0.951 0.902 0.524  |
|     |                      |                   | H 0.866 0.732 0.584  |
|     |                      |                   | H 0.585 0.170 0.056  |
|     |                      |                   | H 0.680 0.360 0.831  |
|     |                      |                   | H 0.691 0.383 0.951  |
|     |                      |                   | S 0.208 0.417 0.654  |
|     |                      |                   | S 0.314 0.629 0.100  |
|     |                      |                   | La 0.970 0.941 0.872 |
|     | La 0.661 0.323 0.340 |                   |                      |
| 300 | <i>Cmcm</i>          | a=2.744           | H 0.002 0.994 0.750  |
|     |                      | b=3.641           | H 0.997 0.005 0.250  |
|     |                      | c=6.181           | H 0.379 0.242 0.421  |
|     |                      | $\alpha=\beta=90$ | H 0.620 0.757 0.921  |
|     |                      | $\gamma=67.88$    | H 0.252 0.495 0.454  |
|     |                      |                   | H 0.747 0.504 0.954  |
|     |                      |                   | H 0.580 0.838 0.750  |
|     |                      |                   | H 0.747 0.504 0.545  |
|     |                      |                   | H 0.620 0.757 0.578  |
|     |                      |                   | H 0.419 0.161 0.250  |
|     |                      |                   | H 0.379 0.242 0.078  |
|     |                      |                   | H 0.252 0.495 0.045  |
|     |                      |                   | S -0.000-0.000-0.000 |
|     |                      |                   | S -0.000-0.000 0.500 |
|     |                      |                   | La 0.295 0.408 0.750 |
|     | La 0.704 0.591 0.250 |                   |                      |
